# Supplementary material for: Apparent pH sensitivity of solution-gated graphene transistors
Source: Royal Society of Chemistry journal article supplement (doi:10.1039/c5nr00414d), 2015-01-01
Supplement: c5nr00414d1.pdf [file c5nr00414d1.pdf]

## Supporting Information

### Apparent pH Sensitivity of Solution-Gated Graphene Transistors

Moo Hyung Lee,<sup>a</sup> Beom Joon Kim,<sup>b</sup> Keun Hyung Lee,<sup>c</sup> Ik-Soo Shin,<sup>d</sup> Wansoo Huh,<sup>a</sup> Jeong Ho Cho,<sup>b, e, \*</sup> and Moon Sung Kang<sup>a, \*</sup>

<sup>a</sup>Department of Chemical Engineering, Soongsil University, Seoul 156-743, Korea

<sup>b</sup>SKKU Advanced Institute of Nanotechnology (SAINT), Sungkyunkwan University, Suwon 440-746, Korea

<sup>c</sup>Department of Chemical Engineering, Inha University, Incheon 402-751, Korea

<sup>d</sup>Department of Chemistry, Soongsil University, Seoul 156-743, Korea

<sup>e</sup>School of Chemical Engineering, Sungkyunkwan University, Suwon 440-746, Korea

\*[mksang@ssu.ac.kr](mailto:mksang@ssu.ac.kr), [jhcho94@skku.edu](mailto:jhcho94@skku.edu)

**Graphene Growth and Device Fabrication.** Graphene film was grown on a Cu foil by chemical vapour deposition in a double walled quartz tube furnace according to a recipe described previously.<sup>1</sup> Briefly, a 25 µm-thick Cu foil (Alfa Aesar) was first inserted into a homemade double-walled quartz tube furnace. After degassing, temperature of the furnace was raised to 1000 °C with H<sub>2</sub> flow (10 sccm) and the temperature was maintained for 30 min. While holding the temperature for another 30 min, a mixture of CH<sub>4</sub> (15 sccm) and H<sub>2</sub> (10 sccm) was subsequently introduced into the tube. Finally, the delivery of CH<sub>4</sub> flow was cut off and the furnace was cooled down to room temperature quickly, which result in formation of monolayer graphene on both sides of the Cu foil. One side of the as-prepared graphene/Cu foil was then spin-coated with poly(methyl methacrylate) (PMMA) dispersed in chlorobenzene and the resulting film was heated at 70°C for 10 min for curing. Subsequently, the graphene monolayer grown on the other side of the foil was removed using O<sub>2</sub> plasma for 2 sec. Following, the remaining Cu layer was etched away using an aqueous solution of 0.1 M ammonium persulphate ((NH<sub>4</sub>)<sub>2</sub>S<sub>2</sub>O<sub>8</sub>). The resulting PMMA/graphene film was transferred onto Si/SiO<sub>2</sub> wafers which were pre-patterned with source/drain and coplanar gate electrodes (Cr/Au). After, rinsing away the top PMMA layer using acetone and deionized water, the active graphene channel was defined by selective etching processes with the aid of photolithography. Subsequently, photoresist (PR) was deposited onto the wafer and patterned to form a photoresist bank (PR bank). Finally, series of pH buffer solutions were drop-casted onto the graphene channel through the exposed area of the PR bank.<sup>1</sup> Note that the insertion of the PR bank was intended to reduce undesired electrochemical reactions between the metal contacts and the pH buffer solution. The electrical measurements were carried out under dark, atmospheric conditions using a MST 5500B

probestation connected with a Keithley 4200.

**Application of ODTS Self-Assembled Monolayer.** *n*-Octadecyltrimethoxysilane (ODTS) self-assembled monolayer was applied onto the Si/SiO<sub>2</sub> substrates with electrodes through the following processes. First, 40 μl of ODTS solution (Gelest) was added into 10 ml of trichloroethylene (TCE). The diluted ODTS solution was spin coated (3000 rpm for 30 s) onto the Si/SiO<sub>2</sub> substrates that were pre-exposed to UV-ozone for 1 hr. The substrate was vapor-annealed under ammonia condition for 12 hr inside a desiccator and then annealed on a hot plate for 20 min at 120°C. Finally, the substrates with ODTS layers were sonicated in toluene and rinsed using toluene.

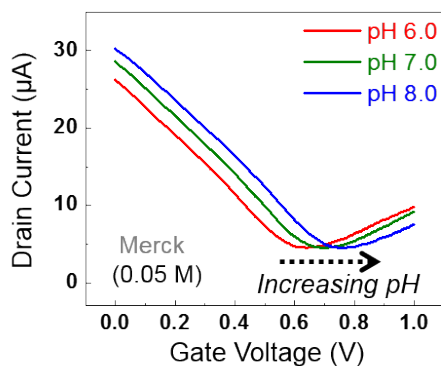

**Fig. S1.** Transfer characteristics of a graphene transistor ( $V_D = 0.05$  V) operated with a reference pH buffer series (pH = 6-8) purchased from Merck.

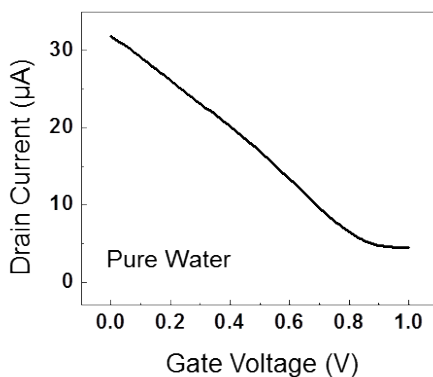

**Fig. S2.** A transfer characteristic of a graphene transistor ( $V_D = 0.05$  V) operated with pure water.

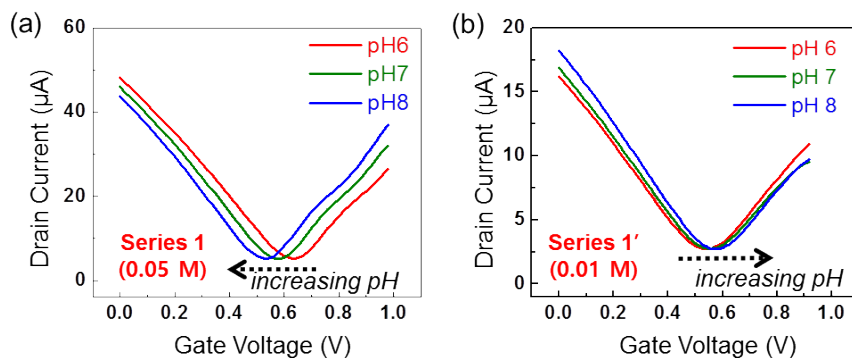

**Fig. S3.** Transfer characteristics of a graphene transistor ( $V_D = 0.5$  V) operated with pH buffer solutions (a) Series 1 and (b) Series 1' (pH = 6~8).

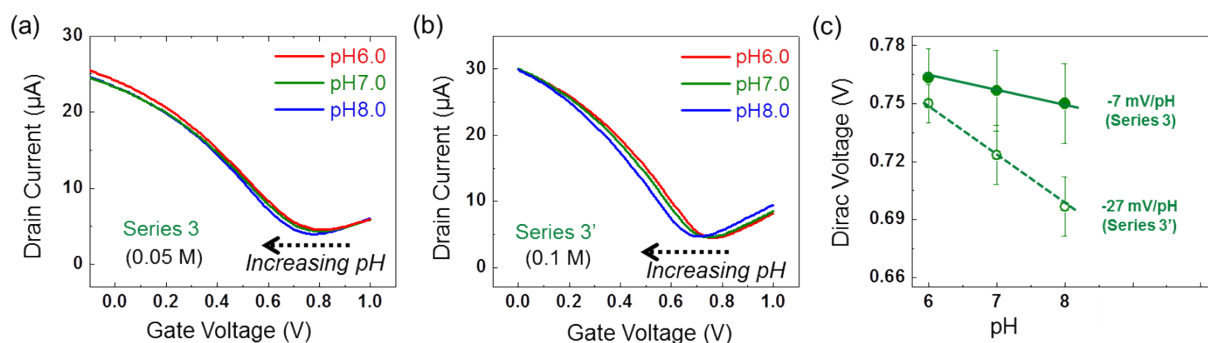

**Fig. S4.** Transfer characteristics of a graphene transistor ( $V_D = 0.05$  V) operated with pH buffer solutions (pH = 6~8) Series 3 (a) and Series 3' (b). (c) Summary of the  $V_{Dirac}$  shift.

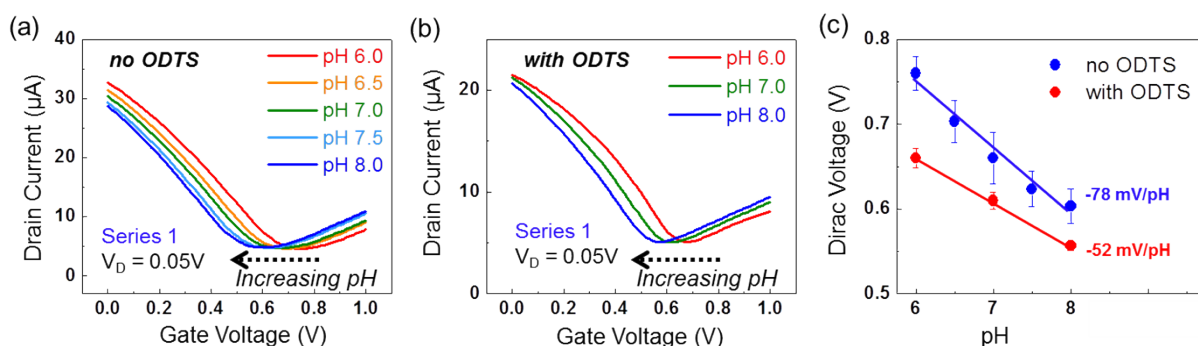

**Fig. S5.** (a) Transfer characteristics of a graphene transistor ( $V_D = 0.05$  V) that was assembled onto bare  $\text{SiO}_2/\text{Si}$  substrate operated with pH buffer solutions Series 1 (pH = 6~8). (b) Transfer characteristics of a graphene transistor at  $V_D = 0.05$  V that was assembled onto self-assembled monolayer (*n*-octadecyltrimethoxysilane, ODTS)-treated  $\text{SiO}_2/\text{Si}$  substrate operated with pH buffer solutions Series 1 (pH = 6~8). (c) Summary of the  $V_{Dirac}$  shift.

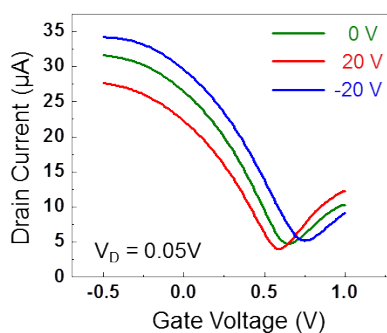

**Fig. S6.** Transfer characteristics of a solution/ $\text{SiO}_2$  dual gateable graphene transistor operated with a buffer solution (pH = 7) of Series 1 under different constant  $V_{BGS}$ .

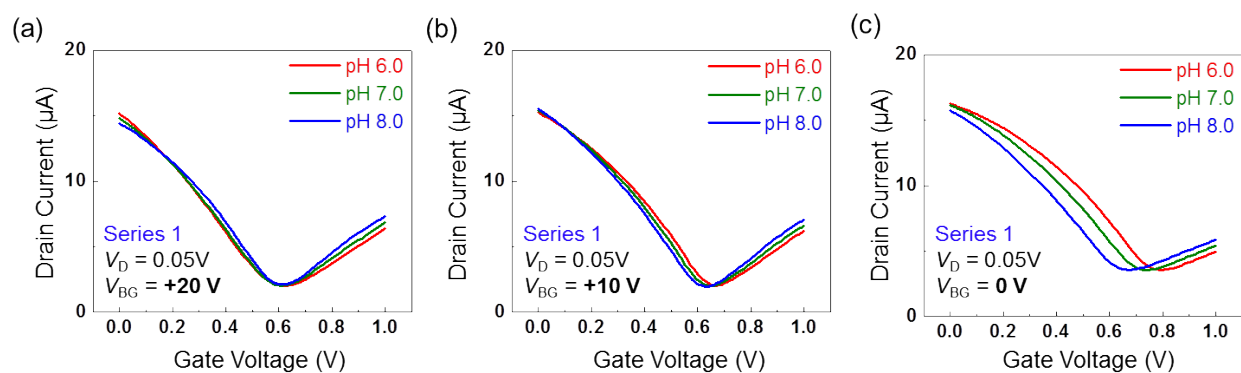

**Fig. S7.** Transfer characteristics of a solution/SiO<sub>2</sub> dual gateable graphene transistor ( $V_D = 0.05$  V). The gate voltage applied to buffer solution (Series 1) under constant  $V_{BG}$ s to the bottom SiO<sub>2</sub>/Si gate. (a)  $V_{BG} = 20$  V, (b)  $V_{BG} = 10$  V, and (c)  $V_{BG} = 0$  V.

## References

1. Kim, B. J.; Um, S. H.; Song, W. C.; Kim, Y. H.; Kang, M. S.; Cho, J. H., Water-Gel for Gating Graphene Transistors. *Nano Lett.* **2014**, *14* 5, 2610-2616.
